# Supplementary figures and images for: Drivers of East Asian millennial-scale climate over the past 400,000 years
Source: Research Square preprint supplement (doi:10.21203/rs.3.rs-1041978/v1), 2022-01-12

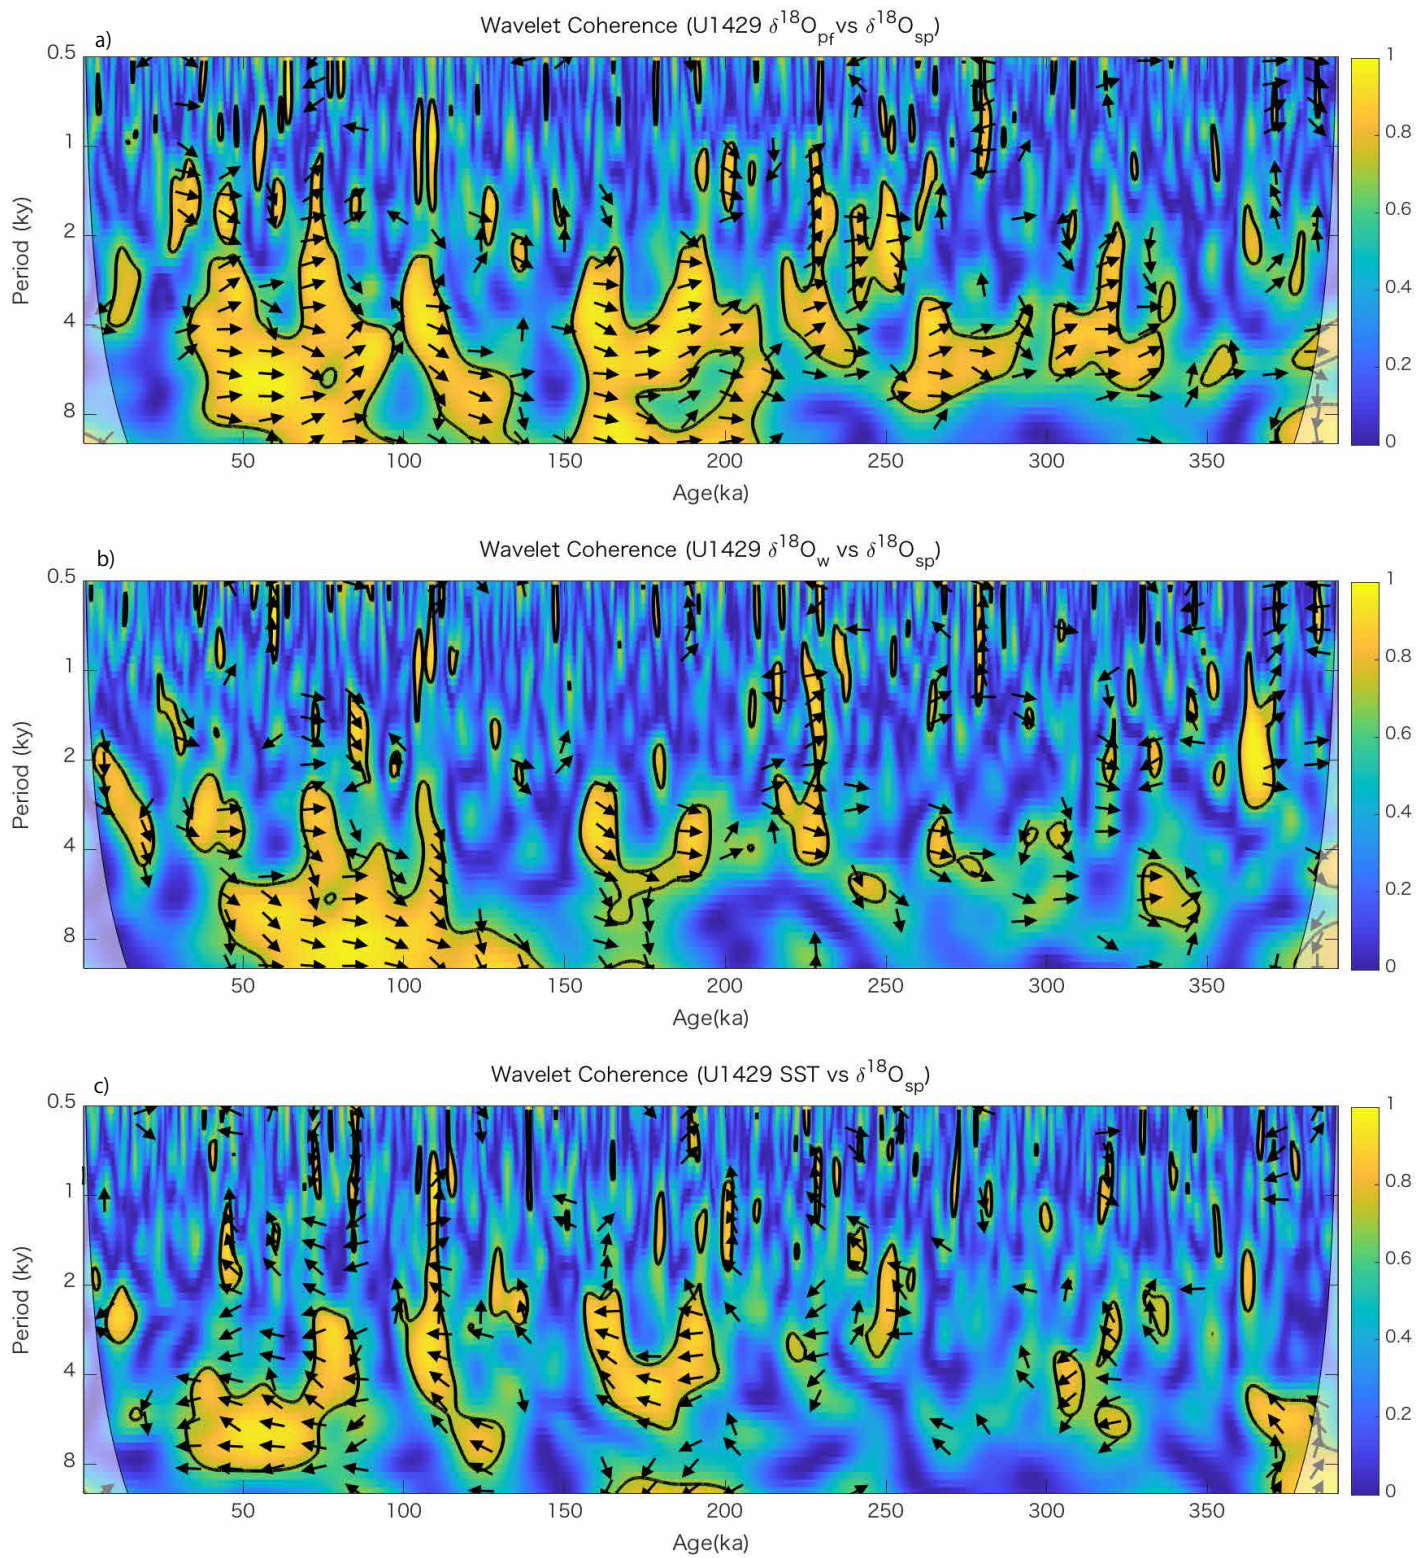

Fig. S10

Supplement: Supplementary file 1 [file 4ffd707361a5f0c0019ac173.pdf]

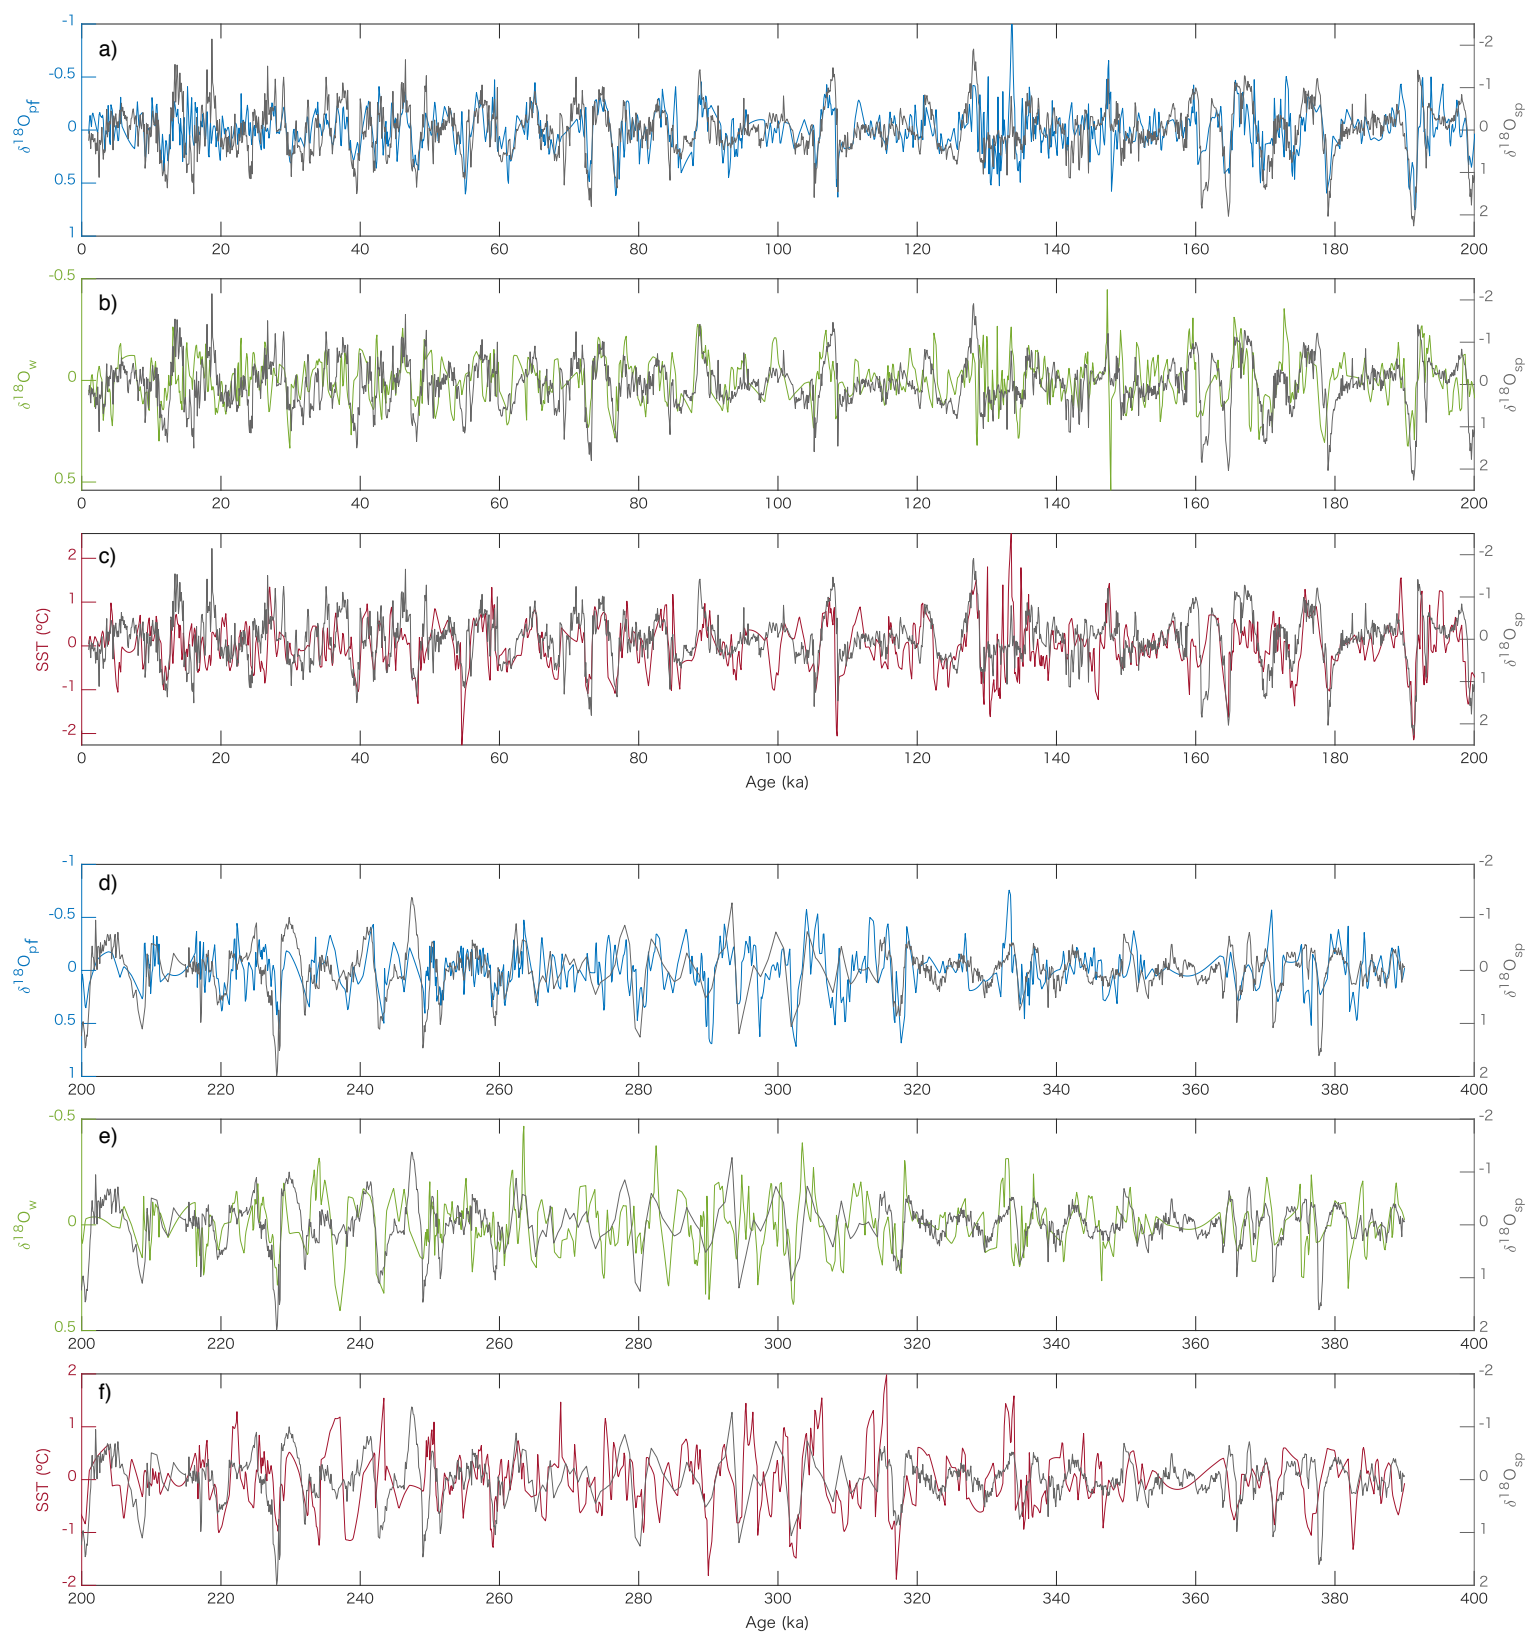

Fig. S9

Supplement: Supplementary file 2 [file 892ed059bd907018d669c794.pdf]

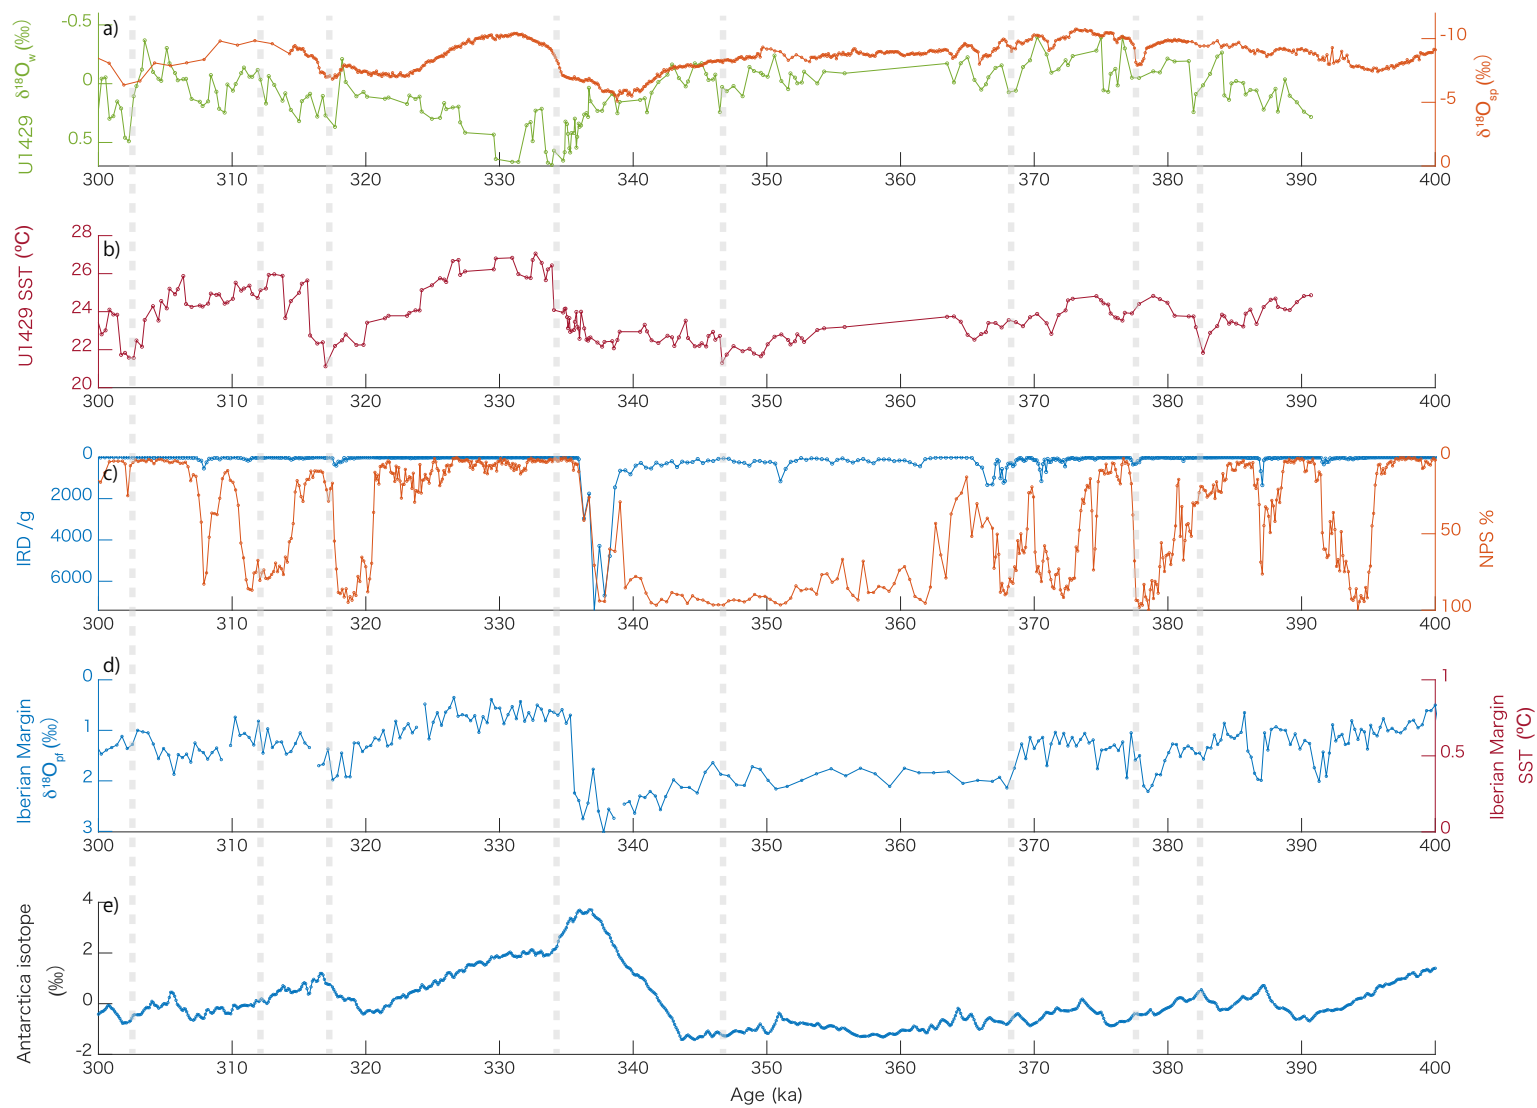

Fig. S7

Supplement: Supplementary file 3 [file 8a5cdd65fcff14bde4217e61.pdf]

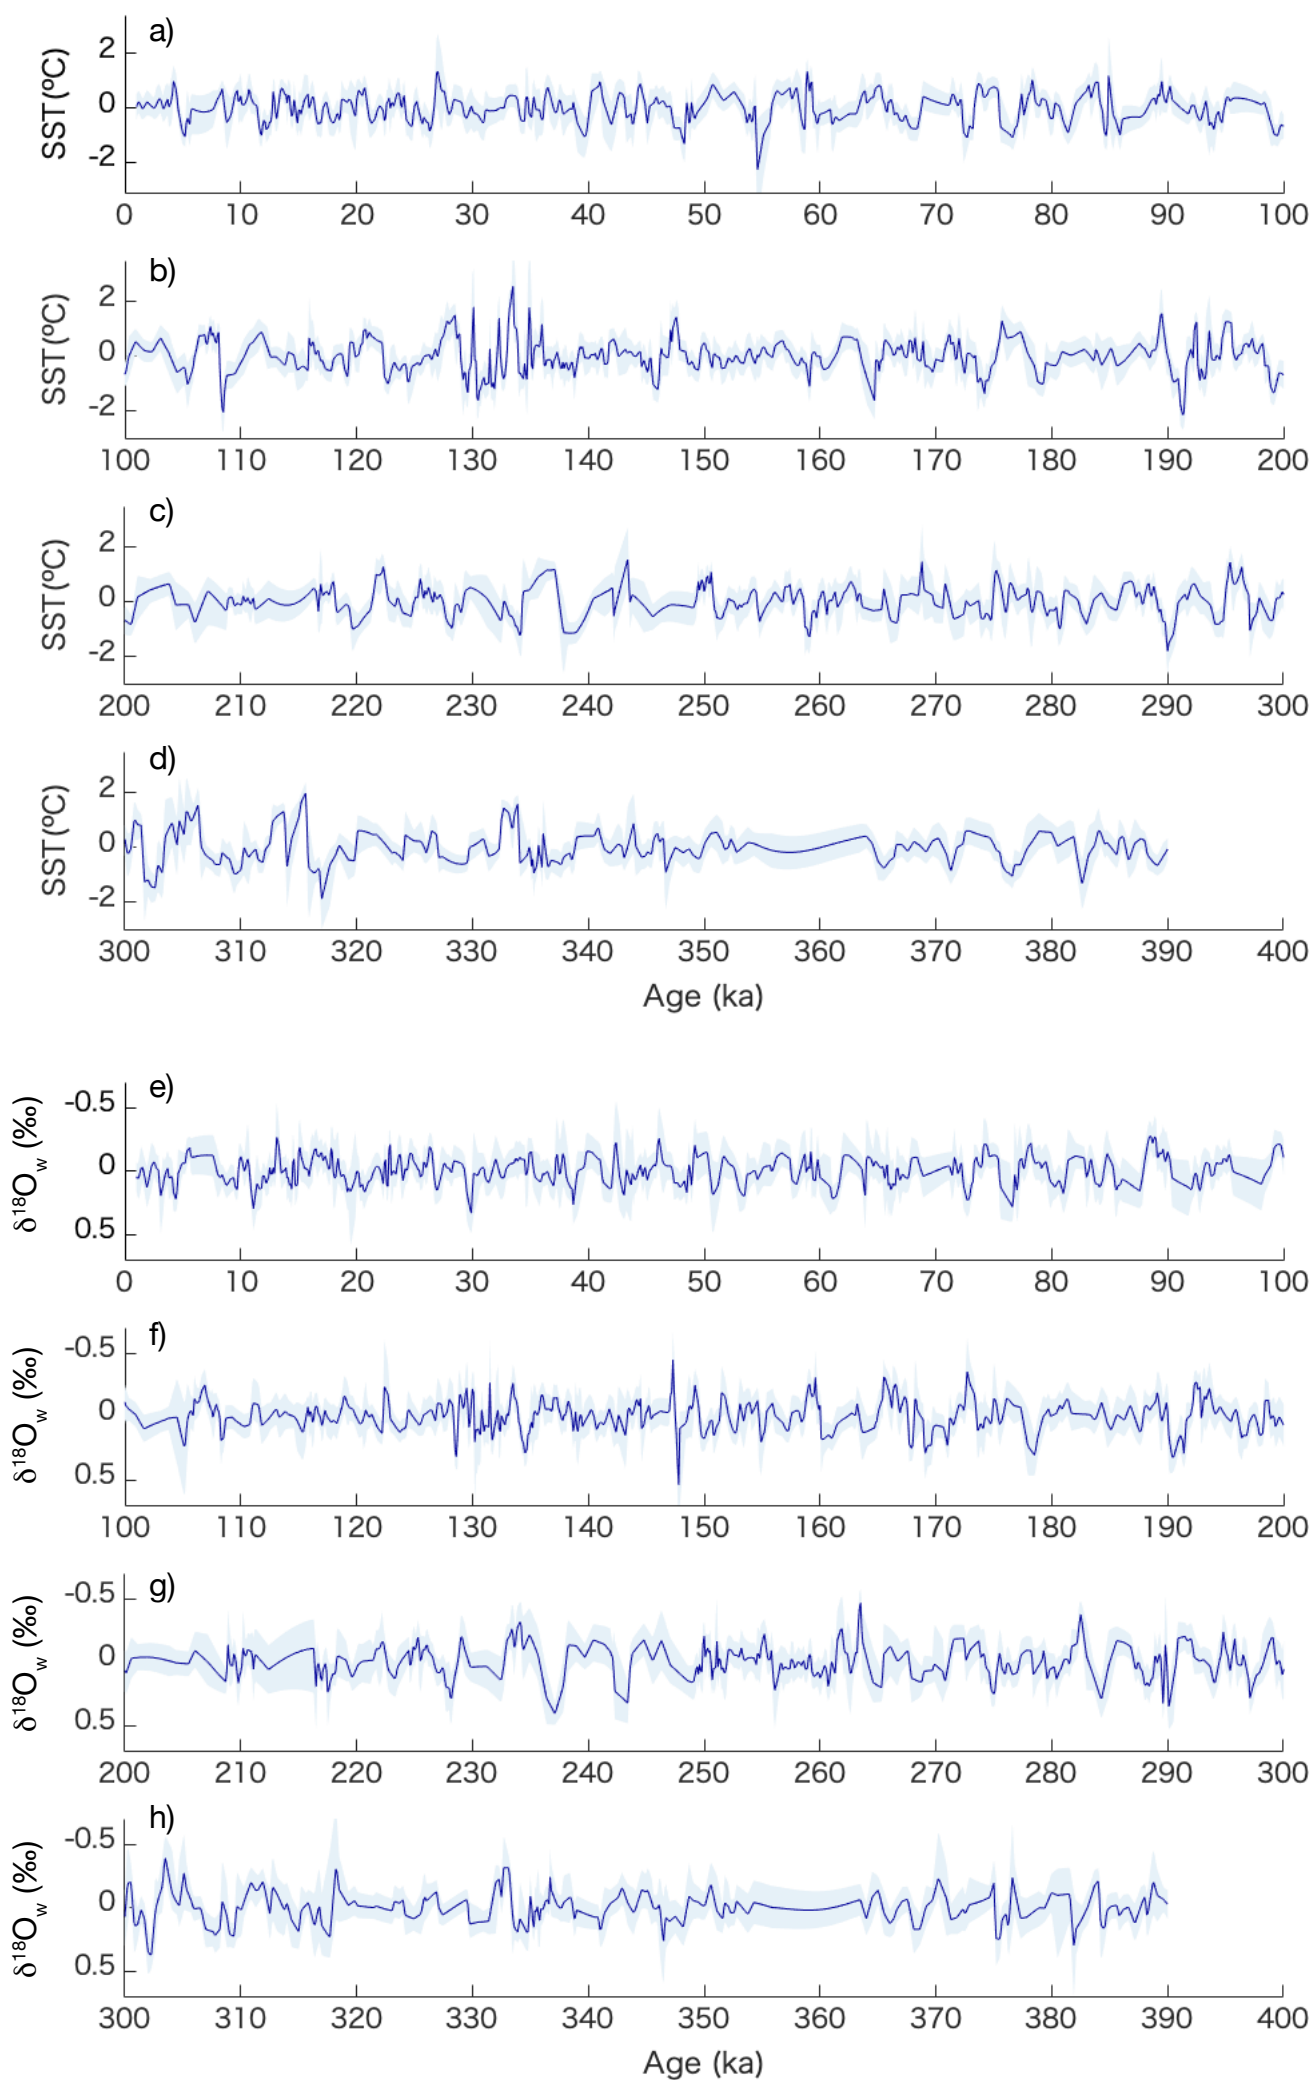

Fig. S3

Supplement: Supplementary file 4 [file 9e228150b859cd0365e05851.pdf]
